# Supplementary material for: Incorporating a microcellular structure into PVDF/graphene–nanoplatelet composites to tune their electrical conductivity and electromagnetic interference shielding properties
Source: Royal Society of Chemistry journal article supplement (doi:10.1039/c8tc03714k), 2018-01-01
Supplement: c8tc03714k1.pdf [file c8tc03714k1.pdf]

**Incorporating a microcellular structure into PVDF/graphene-nanoplatelet composites to tune their electrical conductivity and electromagnetic interference shielding properties**

Biao Zhao, Chongxiang Zhao, Mahdi Hamidinejad, Chongda Wang, Ruosong Li, Sai Wang, Yasamin Kazemi, Chul B. Park\*

Microcellular Plastics Manufacturing Laboratory, Department of Mechanical and Industrial Engineering, University of Toronto, 5 King's College Road, Toronto M5S 3G8, Canada

\* Corresponding Author: Chul B. Park, park@mie.utoronto.ca, Tel: +1- 416-978-3053, Fax: +1- 416-978-7753.

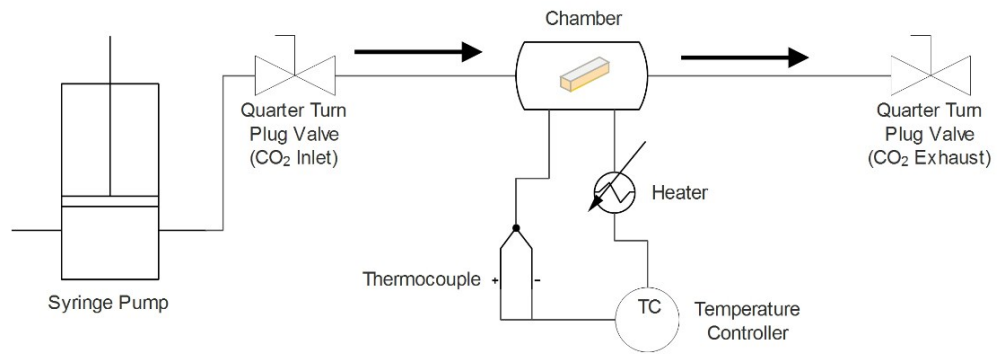

Figure S1 The schematic illustration of a home-made batching foaming instrument.

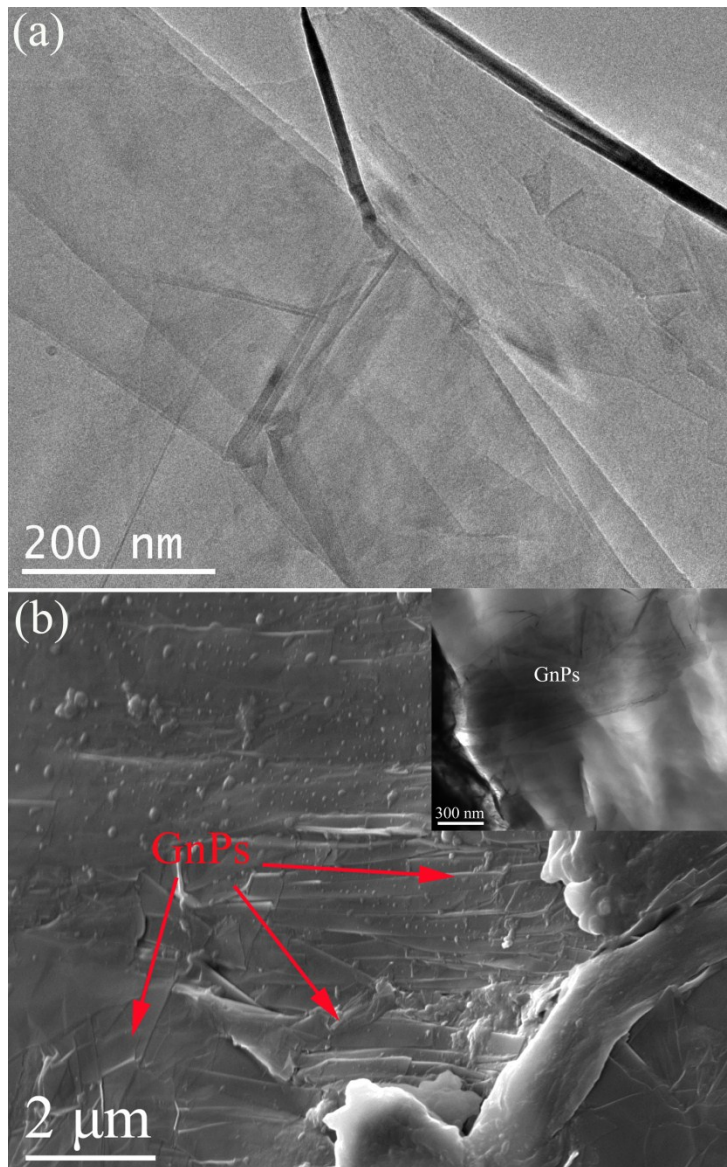

Figure S2 (a) TEM image of raw GnP nanomaterials; (b) SEM image of a PVDF/10wt% GnP solid nanocomposite. The inset in Figure S2b is a TEM image of the PVDF/10wt% GnP composite.

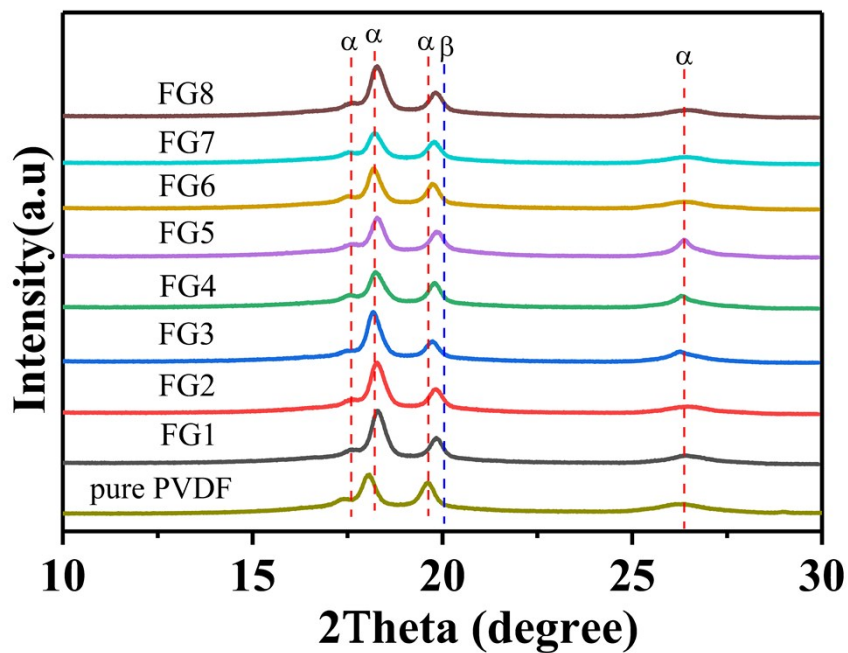

Figure S3 XRD patterns of pure PVDF and various foamed PVDF/GnP nanocomposites prepared at different saturation temperatures.

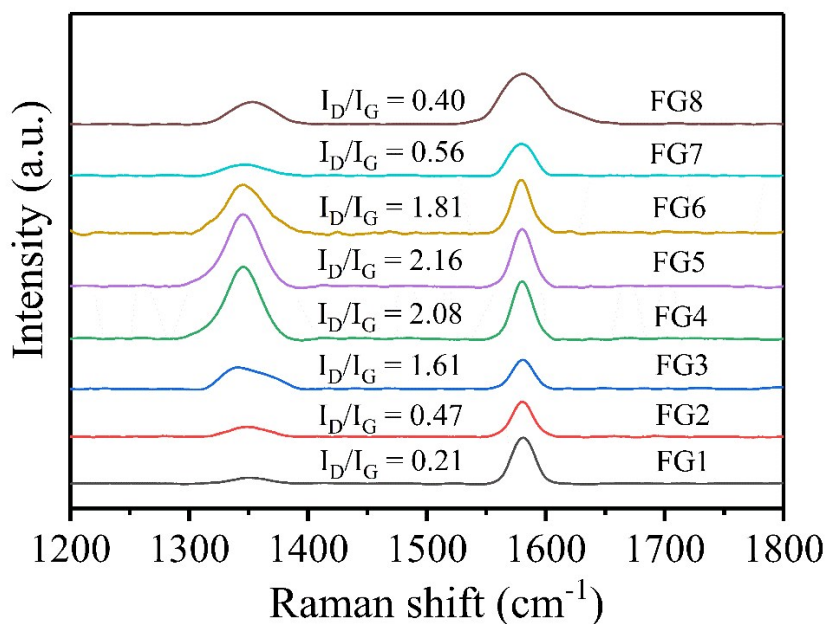

Figure S4 Raman spectra of various foamed PVDF/10wt% GnP nanocomposites prepared at different saturation temperatures.

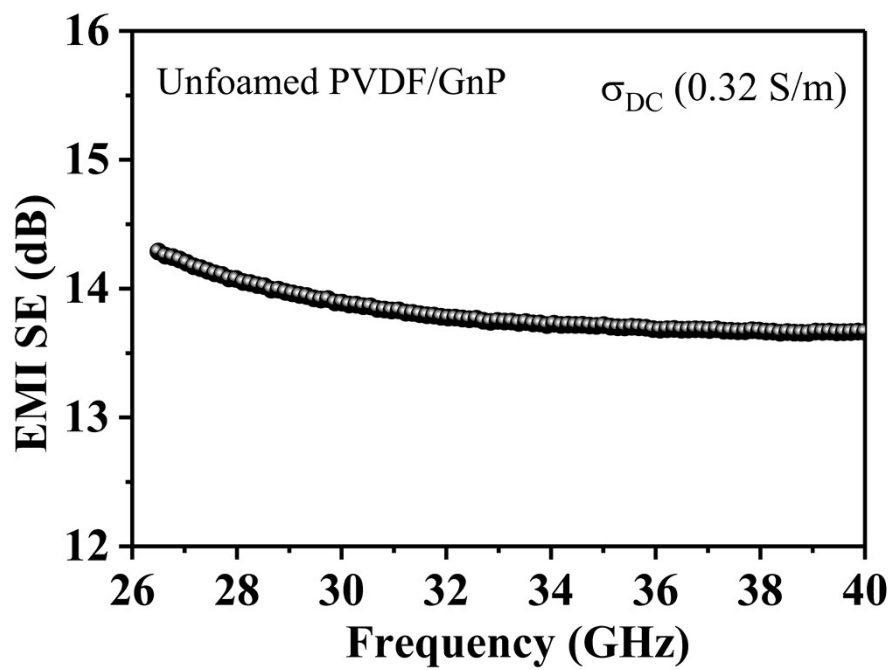

Figure S5 Electrical conductivity and EMI SE properties of the unfoamed PVDF/GnPs composite
